# Supplementary material
Source: publisher figshare collection journal article supplement (https://gsapubs.figshare.com/ndownloader/files/38375786)
Supplement: Supplementary file 1 [file 38375786]

## Sheet: Sheet2
Supplementary Information Table 1. Zircon δ18O and 16OH/16O measurements by SIMS
Date	Analysis Name	Sample_name	Primary Intensity (Cs-beam), nA	16O, cps	YIELD (16O cps/prim. Intensity nA)	16O1H, cps	18O, cps	18O /16O	d18Oraw	d18Oraw 2SE	16O1H/16O	16O1H/16O 2SE	d18OVSMOW	d18O 2SD	16O1H/16O x1000	16O1H/16O x1000 2SE
September 2021 session at 1270 IMS CRPG, Nancy
95100 standard grain (n = 54), d18Oraw = 8.5 ± 0.5 (mean± 2sd). Instrumental mass fractination = -1.4.
1000*16OH/16O = 0.071±0.037 (mean±2sd), range = [0.060 to 0.137]
21-Sep-21<	DZ9In-xl1@1	PM8	2.16e-09	1.45191e+09	6.72183e+17	656052	2.97926e+06	0.00200423	-0.484857	0.203567	0.000451853	5.92e-05	0.879613	0.537417	0.451853	0.0592
21-Sep-21<	DZ9In-xl1@2	PM8	2.15e-09	1.43932e+09	6.69452e+17	537963	2.95349e+06	0.00200435	-0.425983	0.210313	0.000373762	4.48e-06	0.938487	0.540008	0.373762	0.00448
21-Sep-21<	DZ9In-xl2@1	PM8	2.15e-09	1.44806e+09	6.73514e+17	264989	2.9723e+06	0.00200526	0.027927	0.194842	0.000182996	2.5e-07	1.3924	0.534172	0.182996	0.00025
21-Sep-21<	DZ9In-xl2@2	PM8	2.15e-09	1.43661e+09	6.68189e+17	174679	2.94967e+06	0.00200538	0.0877679	0.233245	0.000121592	2.86e-07	1.45224	0.549345	0.121592	0.000286
21-Sep-21<	DZ9In-xl2@3	PM8	2.15e-09	1.43789e+09	6.68787e+17	252628	2.95318e+06	0.00200619	0.492598	0.204704	0.000175693	1.556e-07	1.85707	0.537848	0.175693	0.0001556
21-Sep-21<	DZ9In-xl3@1	PM8	2.15e-09	1.43366e+09	6.6682e+17	241707	2.94435e+06	0.0020064	0.598763	0.220471	0.000168594	1.088e-06	1.96323	0.544044	0.168594	0.001088
21-Sep-21<	DZ9In-xl4@1	PM8	2.15e-09	1.44344e+09	6.71367e+17	137563	2.96476e+06	0.00200627	0.535464	0.179574	9.53021e-05	3.46e-07	1.89993	0.528794	0.0953021	0.000346
21-Sep-21<	DZ9In-xl4@2	PM8	2.13e-09	1.43694e+09	6.74622e+17	168037	2.95158e+06	0.0020061	0.447237	0.179576	0.00011694	4.52e-07	1.81171	0.528795	0.11694	0.000452
21-Sep-21<	DZ9In-xl4@3	PM8	2.13e-09	1.44093e+09	6.76493e+17	143468	2.95955e+06	0.00200657	0.681994	0.202899	9.95661e-05	2.82e-07	2.04646	0.537164	0.0995661	0.000282
21-Sep-21<	DZ9In-xl5@1	PM8	2.14e-09	1466977691	6.85504e+17	689866	3.01242e+06	0.00200619	0.49509	0.173407	0.000470263	2.68e-06	1.85956	0.526732	0.470263	0.00268
21-Sep-21<	DZ9In-xl6@1	PM8	2.11e-09	1.42934e+09	6.77414e+17	433951	2.93584e+06	0.00200636	0.580821	0.258575	0.000303602	2.3e-06	1.94529	0.560569	0.303602	0.0023
21-Sep-21<	DZ9In-xl7@1	PM8	2.12e-09	1.44201e+09	6.80193e+17	133636	2.96176e+06	0.00200613	0.46269	0.300553	9.26733e-05	2.62e-07	1.82716	0.581127	0.0926733	0.000262
21-Sep-21<	DZ9In-xl7@2	PM8	2.11e-09	1.42674e+09	6.76181e+17	131986	2.9302e+06	0.00200568	0.241343	0.212514	9.25085e-05	2.94e-07	1.60581	0.540869	0.0925085	0.000294
21-Sep-21<	DZ9In-xl8@1	PM8	2.1e-09	1.42131e+09	6.76812e+17	6.04074e+06	2.91805e+06	0.00200557	0.184503	0.262502	0.00425014	0.000400528	1.54897	0.562392	4.25014	0.400528
21-Sep-21<	DZ9In-xl9@1	PM8	2.09e-09	1.43428e+09	6.86257e+17	275831	2.94241e+06	0.00200391	-0.643534	0.177523	0.000192314	2.16e-06	0.720936	0.528102	0.192314	0.00216
21-Sep-21<	DZ9In-xl9@2	PM8	2.09e-09	1.4274e+09	6.82968e+17	246425	2.93029e+06	0.00200522	0.00947532	0.206434	0.000172639	3.52e-07	1.37395	0.538509	0.172639	0.000352
21-Sep-21<	DZ9In-xl9@3	PM8	2.08e-09	1.43453e+09	6.8968e+17	141603	2.94589e+06	0.00200587	0.335073	0.158755	9.87101e-05	2.58e-07	1.69954	0.522092	0.0987101	0.000258
21-Sep-21<	DZ9In-xl10@1	PM8	2.08e-09	1424788046	6.84994e+17	215939	2.92838e+06	0.00200748	1.13889	0.160038	0.000151559	9.22e-07	2.50336	0.522484	0.151559	0.000922
21-Sep-21<	DZ9In-xl11@1	PM8	2.08e-09	1.44041e+09	6.92506e+17	162329	2.95901e+06	0.00200666	0.727842	0.23599	0.000112696	8.98e-07	2.09231	0.550516	0.112696	0.000898
21-Sep-21<	DZ9In-xl11@2	PM8	2.08e-09	1.4296e+09	6.8731e+17	124876	2.93788e+06	0.00200724	1.01684	0.256688	8.73501e-05	3.06e-07	2.38131	0.559702	0.0873501	0.000306
21-Sep-21<	DZ9In-xl12@1	PM8	2.07e-09	1.43031e+09	6.90972e+17	225231	2.93886e+06	0.00200723	1.01335	0.242881	0.00015747	2.64e-07	2.37782	0.553505	0.15747	0.000264
21-Sep-21<	DZ9In-xl12@2	PM8	2.07e-09	1.36244e+09	6.58186e+17	266561	2.78909e+06	0.00199983	-2.68263	0.248302	0.000195649	5.82e-06	-1.31816	0.555906	0.195649	0.00582
21-Sep-21<	DZ9In-xl13@1	PM8	2.06e-09	1.41202e+09	6.85445e+17	151840	2.90174e+06	0.00200763	1.21211	0.237842	0.000107534	1.316e-06	2.57658	0.551313	0.107534	0.001316
21-Sep-21<	DZ9In-xl13@2	PM8	2.06e-09	1.4038e+09	6.81456e+17	465066	2.88345e+06	0.00200635	0.571849	0.228863	0.000331291	3.48e-06	1.93632	0.547499	0.331291	0.00348
21-Sep-21<	DZ9In-xl14@1	PM8	2.06e-09	1.40193e+09	6.80549e+17	644572	2.87536e+06	0.00200315	-1.02436	0.177533	0.000459775	1.436e-06	0.340108	0.528105	0.459775	0.001436
21-Sep-21<	DZ9In-xl14@2	PM8	2.05e-09	1.40207e+09	6.83937e+17	204660	2.87972e+06	0.00200614	0.467674	0.214372	0.00014597	5.98e-07	1.83214	0.541602	0.14597	0.000598
21-Sep-21<	DZ9In-xl15@1	PM8	2.05e-09	1.40544e+09	6.85578e+17	164546	2.88744e+06	0.00200657	0.680499	0.23886	0.000117078	2.22e-07	2.04497	0.551753	0.117078	0.000222
21-Sep-21<	DZ9In-xl15@2	PM8	2.05e-09	1.39866e+09	6.82273e+17	271019	2.87339e+06	0.00200612	0.457705	0.242541	0.000193771	3.22e-07	1.82217	0.553356	0.193771	0.000322
21-Sep-21<	DZ9In-xl16@1	PM8	2.04e-09	1.40778e+09	6.90086e+17	139624	2.89204e+06	0.00200631	0.5559	0.1947	9.91803e-05	2.68e-07	1.92037	0.534121	0.0991803	0.000268
22-Sep-21<	DZ9In-xl17@1	PM8	2.03e-09	1.40464e+09	6.91938e+17	192269	2.88491e+06	0.00200616	0.477145	0.164869	0.000136882	1.002e-06	1.84162	0.523983	0.136882	0.001002
22-Sep-21<	DZ9In-xl17@2	PM8	2.02e-09	1.40612e+09	6.96099e+17	254250	2.8884e+06	0.00200658	0.686479	0.222645	0.000180817	3.26e-06	2.05095	0.544929	0.180817	0.00326
22-Sep-21<	DZ9In-xl18@1	PM8	2.02e-09	1.39016e+09	6.88199e+17	676107	2.8551e+06	0.00200625	0.521508	0.283719	0.000486351	1.88e-05	1.88394	0.572602	0.486351	0.0188
22-Sep-21<	DZ9In-xl18@2	PM8	2.02e-09	1.39882e+09	6.92483e+17	280623	2.87322e+06	0.00200663	0.712393	0.224205	0.000200614	9.64e-07	2.07482	0.545568	0.200614	0.000964
22-Sep-21<	DZ9In-xl19@1	PM8	2.02e-09	1.38495e+09	6.85621e+17	803776	2.84154e+06	0.0020037	-0.747836	0.190729	0.000580363	1.422e-06	0.616634	0.532686	0.580363	0.001422
22-Sep-21<	DZ9In-xl20@1	PM8	2.01e-09	1.39849e+09	6.95767e+17	173288	2.87384e+06	0.00200727	1.02979	0.253372	0.00012391	2.12e-07	2.39426	0.558188	0.12391	0.000212
22-Sep-21<	DZ9In-xl21@1	PM8	2.01e-09	1.39622e+09	6.94639e+17	159233	2.86815e+06	0.00200667	0.731829	0.232282	0.000114045	2.16e-06	2.0963	0.548937	0.114045	0.00216
22-Sep-21<	DZ9In-xl21@2	PM8	2e-09	1.38514e+09	6.92572e+17	277414	2.8459e+06	0.00200746	1.12444	0.27272	0.000200279	1.216e-06	2.48891	0.567233	0.200279	0.001216
22-Sep-21<	DZ9In-xl22@1	PM8	2e-09	1.39482e+09	6.97411e+17	126804	2.86642e+06	0.00200758	1.1877	0.223188	9.09106e-05	3.4e-07	2.55217	0.545151	0.0909106	0.00034
22-Sep-21<	DZ9In-xl23@1	PM8	2e-09	1.40372e+09	7.01859e+17	555896	2.88321e+06	0.00200604	0.419322	0.229967	0.000396017	1.392e-06	1.78379	0.547961	0.396017	0.001392
22-Sep-21<	DZ9In-xl24@1	PM8	2e-09	1.40546e+09	7.02729e+17	137678	2.88674e+06	0.00200653	0.665049	0.224964	9.79597e-05	4.68e-07	2.02952	0.545881	0.0979597	0.000468
22-Sep-21<	DZ9In-xl24@2	PM8	1.99e-09	1.38766e+09	6.97317e+17	137396	2.85147e+06	0.00200741	1.10402	0.236185	9.90124e-05	3.58e-07	2.46849	0.5506	0.0990124	0.000358
22-Sep-21<	DZ9In-xl25@1	PM8	1.99e-09	1.38104e+09	6.9399e+17	450842	2.83726e+06	0.00200717	0.984454	0.174451	0.000326451	2.72e-06	2.34892	0.527077	0.326451	0.00272
22-Sep-21<	DZ9In-xl26@1	PM8	1.99e-09	1.37609e+09	6.91503e+17	250963	2.82671e+06	0.00200672	0.759735	0.237503	0.000182374	1.828e-07	2.12421	0.551167	0.182374	0.0001828
22-Sep-21<	DZ9In-xl27@1	PM8	1.98e-09	1.36499e+09	6.89388e+17	145348	2.80408e+06	0.00200661	0.700931	0.262364	0.000106483	4.36e-07	2.0654	0.562327	0.106483	0.000436
22-Sep-21<	DZ9In-xl28@1	PM8	1.98e-09	1.36453e+09	6.89156e+17	370019	2.80328e+06	0.00200656	0.67701	0.217521	0.00027117	3.32e-06	2.04148	0.542855	0.27117	0.00332
22-Sep-21<	DZ9In-xl29@1	PM8	1.97e-09	1.35298e+09	6.86794e+17	142915	2.77895e+06	0.00200682	0.808072	0.241287	0.00010563	4.78e-07	2.17254	0.552807	0.10563	0.000478
22-Sep-21<	DZ9In-xl29@2	PM8	1.97e-09	1.36529e+09	6.9304e+17	167356	2.8038e+06	0.00200602	0.410349	0.307677	0.000122579	5.12e-07	1.77482	0.584844	0.122579	0.000512
22-Sep-21<	DZ9In-xl29@3	PM8	1.98e-09	1.36314e+09	6.88456e+17	240477	2.79952e+06	0.00200634	0.570354	0.27678	0.000176413	1.878e-07	1.93482	0.569196	0.176413	0.0001878
22-Sep-21<	DZ9In-xl29@4	PM8	1.97e-09	1.35967e+09	6.90189e+17	159808	2.79199e+06	0.00200617	0.483127	0.175557	0.000117534	2.94e-06	1.8476	0.527444	0.117534	0.00294
22-Sep-21<	DZ9In-PB177-xl1@1	PB177	1.97e-09	1.3297e+09	6.74974e+17	9.90851e+06	2.7146e+06	0.0019936	-5.80075	0.230267	0.0074517	0.0001592	-4.43628	0.548087	7.4517	0.1592
22-Sep-21<	DZ9In-PB177-xl1@2	PB177	1.96e-09	1.35572e+09	6.91693e+17	1.52443e+07	2.77753e+06	0.00200137	-1.91036	0.300859	0.0112444	9.54e-05	-0.545891	0.581286	11.2444	0.0954
22-Sep-21<	DZ9In-PB177-xl2@1	PB177	1.95e-09	1.32464e+09	6.79302e+17	4.5799e+06	2.69635e+06	0.0019887	-8.26466	0.267202	0.00345747	2.06e-05	-6.90019	0.5646	3.45747	0.0206
22-Sep-21<	DZ9In-PB177-xl3@1	PB177	1.95e-09	1.35391e+09	6.94314e+17	1.42396e+07	2.77347e+06	0.00200085	-2.16972	0.247685	0.0105174	2.02e-05	-0.805247	0.55563	10.5174	0.0202
22-Sep-21<	DZ9In-PB177-xl3@2	PB177	1.95e-09	1.35097e+09	6.92805e+17	1.81535e+07	2.7716e+06	0.00200385	-0.672977	0.348424	0.0134374	5.58e-05	0.691493	0.607269	13.4374	0.0558
22-Sep-21<	DZ9In-PB177-xl4@1	PB177	1.95e-09	1.31259e+09	6.73124e+17	1.49998e+07	2.69531e+06	0.00200603	0.412841	0.256304	0.0114276	0.0001558	1.77731	0.559525	11.4276	0.1558
22-Sep-21<	DZ9In-PB177-xl4@2	PB177	1.94e-09	1.3384e+09	6.89897e+17	1.68373e+07	2.74773e+06	0.00200585	0.322609	0.22962	0.0125801	8.9e-05	1.68708	0.547816	12.5801	0.089
22-Sep-21<	DZ9In-PB177-xl5@1	PB177	1.94e-09	1.3074e+09	6.73919e+17	671959	2.65893e+06	0.00198627	-9.48479	0.190219	0.000513965	9.72e-07	-8.12032	0.532504	0.513965	0.000972
22-Sep-21<	DZ9In-PB177-xl6@1	PB177	1.93e-09	1.29817e+09	6.72624e+17	642534	2.64066e+06	0.00198696	-9.13898	0.200411	0.000494955	3.36e-06	-7.77451	0.536229	0.494955	0.00336
22-Sep-21<	DZ9In-PB177-xl6@2	PB177	1.93e-09	1.28659e+09	6.66625e+17	553160	2.61802e+06	0.0019875	-8.86875	0.23998	0.000429943	9.18e-06	-7.50428	0.552238	0.429943	0.00918
22-Sep-21<	DZ9In-PB177-xl7@1	PB177	1.93e-09	1.28143e+09	6.63956e+17	1.4352e+06	2.60709e+06	0.00198664	-9.30105	0.231376	0.00112	4.96e-05	-7.93658	0.548554	1.12	0.0496
22-Sep-21<	DZ9In-PB177-xl8@1	PB177	1.92e-09	1.30172e+09	6.77982e+17	932980	2.64859e+06	0.00198697	-9.13143	0.272975	0.000716726	1.324e-05	-7.76696	0.567355	0.716726	0.01324
22-Sep-21<	DZ9In-PB177-xl8@2	PB177	1.92e-09	1.29221e+09	6.73028e+17	567923	2.62896e+06	0.00198696	-9.13848	0.223982	0.000439496	9.04e-06	-7.77401	0.545477	0.439496	0.00904
22-Sep-21<	DZ9In-PB177-xl9@1	PB177	1.93e-09	1.31359e+09	6.80617e+17	756704	2.6725e+06	0.00198654	-9.34736	0.245032	0.000576057	1.246e-06	-7.98289	0.554453	0.576057	0.001246
22-Sep-21<	DZ9In-PB177-xl10@1	PB177	1.93e-09	1.31357e+09	6.80605e+17	7.59881e+06	2.68002e+06	0.00199254	-6.3331	0.19866	0.00578486	0.0001122	-4.96863	0.535577	5.78486	0.1122
22-Sep-21<	DZ9In-PB177-xl10@2	PB177	1.92e-09	1.29533e+09	6.74649e+17	720153	2.63568e+06	0.00198806	-8.58653	0.209854	0.000555963	1.164e-06	-7.22206	0.539829	0.555963	0.001164
22-Sep-21<	DZ9In-PB177-xl11@1	PB177	1.91e-09	1.29848e+09	6.79833e+17	706606	2.64171e+06	0.00198677	-9.23411	0.18412	0.000544179	2.64e-07	-7.86964	0.530356	0.544179	0.000264
22-Sep-21<	DZ9In-PB177-xl11@2	PB177	1.91e-09	1.29123e+09	6.76038e+17	2.70973e+06	2.62724e+06	0.00198725	-8.99254	0.179116	0.00209856	5.68e-05	-7.62807	0.528639	2.09856	0.0568
22-Sep-21<	DZ9In-PB177-xl12@1	PB177	1.91e-09	1.31792e+09	6.90011e+17	6.9696e+06	2.69169e+06	0.00199483	-5.18247	0.232471	0.00528833	5.92e-05	-3.818	0.549017	5.28833	0.0592
22-Sep-21<	DZ9In-PB177-xl13@1	PB177	1.91e-09	1.30279e+09	6.82089e+17	4.27277e+06	2.65479e+06	0.00198993	-7.64434	0.257616	0.00327971	0.0001262	-6.27987	0.560127	3.27971	0.1262
22-Sep-21<	DZ9In-PB177-xl14@1	PB177	1.91e-09	1.3129e+09	6.87385e+17	1.47738e+07	2.6875e+06	0.00199873	-3.22983	0.212726	0.0112528	0.0001074	-1.86536	0.540952	11.2528	0.1074
22-Sep-21<	DZ9In-PB177-xl15@1	PB177	1.9e-09	1.27281e+09	6.69901e+17	1.2651e+06	2.59013e+06	0.0019865	-9.368	0.179936	0.000993944	1.564e-05	-8.00353	0.528918	0.993944	0.01564
22-Sep-21<	DZ9In-PB161-xl1@1	PB161	1.87e-09	1.26893e+09	6.7857e+17	1.2849e+06	2.58747e+06	0.00199103	-7.09322	0.233705	0.00101259	3.52e-06	-5.72875	0.549541	1.01259	0.00352
22-Sep-21<	DZ9In-PB161-xl1@2	PB161	1.87e-09	1.29231e+09	6.91075e+17	1.21966e+07	2.64449e+06	0.00199795	-3.62065	0.242373	0.0094378	0.0001152	-2.25618	0.553283	9.4378	0.1152
22-Sep-21<	DZ9In-PB161-xl2@1	PB161	1.86e-09	1.24283e+09	6.6819e+17	2.69029e+06	2.5415e+06	0.00199653	-4.33063	0.228753	0.00216464	5.86e-05	-2.96616	0.547453	2.16464	0.0586
22-Sep-21<	DZ9In-PB161-xl2@1	PB161	1.86e-09	1.24283e+09	6.6819e+17	2.69029e+06	2.5415e+06	0.00199653	-4.33063	0.228753	0.00216464	5.86e-05	-2.96616	0.547453	2.16464	0.0586
22-Sep-21<	DZ9In-PB161-xl2@2	PB161	1.86e-09	1.28676e+09	6.91808e+17	1.11368e+07	2.63285e+06	0.00199819	-3.50003	0.27015	0.00865491	0.0001742	-2.13556	0.566002	8.65491	0.1742
22-Sep-21<	DZ9In-PB161-xl2@3	PB161	1.86e-09	1.26434e+09	6.79753e+17	497262	2.57678e+06	0.00199011	-7.55289	0.289529	0.000393298	1.38e-06	-6.18842	0.575503	0.393298	0.00138
22-Sep-21<	DZ9In-PB161-xl3@1	PB161	1.84e-09	1.24984e+09	6.79263e+17	385860	2.54731e+06	0.00199021	-7.50365	0.245653	0.000308727	8.16e-07	-6.13918	0.554727	0.308727	0.000816
22-Sep-21<	DZ9In-PB161-xl3@2	PB161	1.85e-09	1.2547e+09	6.78218e+17	2.2909e+06	2.55811e+06	0.00199171	-6.75074	0.246271	0.00182585	2.16e-05	-5.38627	0.555001	1.82585	0.0216
22-Sep-21<	DZ9In-PB161-xl4@1	PB161	1.85e-09	1.25074e+09	6.76078e+17	362771	2.54919e+06	0.00199078	-7.21829	0.282408	0.000290044	3.1e-07	-5.85382	0.571954	0.290044	0.00031
22-Sep-21<	DZ9In-PB161-xl5@1	PB161	1.84e-09	1.24108e+09	6.74497e+17	275917	2.52931e+06	0.00199029	-7.46496	0.327845	0.000222321	6.86e-07	-6.10049	0.595701	0.222321	0.000686
22-Sep-21<	DZ9In-Penglai@1	Penglai	1.84e-09	1.26217e+09	6.8596e+17	220042	2.6024e+06	0.00201328	4.02093	0.226178	0.000174337	2.9e-07	5.3854	0.546382	0.174337	0.00029
22-Sep-21<	DZ9In-WT1-3-xl1@1	WT1-3	1.82e-09	1.23593e+09	6.79085e+17	634817	2.53993e+06	0.00200628	0.539452	0.33157	0.000513633	1.056e-05	1.90392	0.597759	0.513633	0.01056
22-Sep-21<	DZ9In-WT1-3-xl2@1	WT1-3	1.81e-09	1.24819e+09	6.89606e+17	2.25098e+06	2.56386e+06	0.00200571	0.253309	0.238142	0.0018034	0.0001022	1.61778	0.551442	1.8034	0.1022
22-Sep-21<	DZ9In-WT1-3-xl3@1	WT1-3	1.82e-09	1.22607e+09	6.73664e+17	267126	2.51844e+06	0.00200576	0.280232	0.293781	0.000217872	1.536e-06	1.6447	0.577654	0.217872	0.001536
22-Sep-21<	DZ9In-WT1-3-xl4@1	WT1-3	1.82e-09	1.23438e+09	6.78233e+17	332802	2.5353e+06	0.00200645	0.625179	0.208799	0.000269609	2.38e-07	1.98965	0.53942	0.269609	0.000238
22-Sep-21<	DZ9In-WT1-3-xl4@2	WT1-3	1.81e-09	1.22513e+09	6.76867e+17	248737	2.51741e+06	0.00200702	0.907228	0.245241	0.000203029	4.94e-07	2.2717	0.554545	0.203029	0.000494
22-Sep-21<	DZ9In-WT1-3-xl5@1	WT1-3	1.8e-09	1.28184e+09	7.12133e+17	2.41046e+07	2.64767e+06	0.00201703	5.88133	0.217839	0.0188047	4.96e-05	7.2458	0.542983	18.8047	0.0496
22-Sep-21<	DZ9In-WT1-3-xl6@1	WT1-3	1.8e-09	1.23279e+09	6.84884e+17	368329	2.53338e+06	0.00200651	0.654583	0.188261	0.000298777	4.38e-07	2.01905	0.531807	0.298777	0.000438
22-Sep-21<	DZ9In-Penglai@2	Penglai	1.8e-09	1.21699e+09	6.76104e+17	175424	2.50975e+06	0.00201399	4.37253	0.210121	0.000144147	3.08e-07	5.737	0.539933	0.144147	0.000308
22-Sep-21<	DZ9In-Penglai@3	Penglai	1.79e-09	1.22272e+09	6.83086e+17	162681	2.52087e+06	0.00201315	3.95934	0.281778	0.000133048	4.42e-07	5.32381	0.571643	0.133048	0.000442
22-Sep-21<	DZ9In-Penglai@4	Penglai	1.78e-09	1.20875e+09	6.7907e+17	175742	2.49289e+06	0.00201327	4.01646	0.23548	0.000145392	3.46e-07	5.38093	0.550298	0.145392	0.000346
22-Sep-21<	DZ9In-WT1-3-xl7@1	WT1-3	1.79e-09	1.22119e+09	6.82231e+17	1.35002e+06	2.50849e+06	0.00200628	0.536461	0.282045	0.0011055	2.56e-05	1.90093	0.571775	1.1055	0.0256
22-Sep-21<	DZ9In-WT1-3-xl7@2	WT1-3	1.77e-09	1.21281e+09	6.85202e+17	675560	2491616	0.00200667	0.732327	0.269664	0.000557022	2.48e-05	2.0968	0.56577	0.557022	0.0248
22-Sep-21<	DZ9InPZ10-xl1@2	PZ10	1.76e-09	1.23795e+09	7.03381e+17	1.15942e+07	2.53564e+06	0.00200004	-2.57863	0.15052	0.00936563	6.44e-05	-1.21416	0.519647	9.36563	0.0644
22-Sep-21<	DZ9InPZ10-xl2@1	PZ10	1.77e-09	1.2713e+09	7.18251e+17	1.76963e+07	2.61633e+06	0.00200987	2.32823	0.24511	0.0139198	0.0001662	3.6927	0.554487	13.9198	0.1662
22-Sep-21<	DZ9InPZ10-xl3@1	PZ10	1.76e-09	1.23687e+09	7.02768e+17	1.26202e+07	2.53799e+06	0.0020041	-0.551219	0.284813	0.0102033	0.0001774	0.813251	0.573145	10.2033	0.1774
22-Sep-21<	DZ9InPZ10-xl4@1	PZ10	1.77e-09	1.22318e+09	6.91064e+17	1.73911e+06	2.49593e+06	0.00199263	-6.28743	0.185392	0.00142179	3.52e-06	-4.92296	0.530798	1.42179	0.00352
22-Sep-21<	DZ9InPZ10-xl4@2	PZ10	1.79e-09	1.22927e+09	6.86743e+17	555747	2.50837e+06	0.00199316	-6.02148	0.235119	0.000452095	3.52e-06	-4.65701	0.550143	0.452095	0.00352
22-Sep-21<	DZ9InPZ10-xl5@1	PZ10	1.79e-09	1.2789e+09	7.14467e+17	1.50674e+07	2.61692e+06	0.0019987	-3.24834	0.287756	0.0117816	0.00024458	-1.88387	0.574613	11.7816	0.24458
22-Sep-21<	DZ9InPZ10-xl6@1	PZ10	1.77e-09	1.24489e+09	7.0333e+17	9.116e+06	2.54829e+06	0.00199899	-3.10375	0.214634	0.00732272	0.0001034	-1.73928	0.541705	7.32272	0.1034
22-Sep-21<	DZ9InPZ10-xl7@1	PZ10	1.76e-09	1.21042e+09	6.87736e+17	578496	2.46871e+06	0.00199238	-6.4139	0.288398	0.000477932	2.06e-07	-5.04943	0.574935	0.477932	0.000206
22-Sep-21<	DZ9InPZ10-xl8@1	PZ10	1.76e-09	1.21913e+09	6.92686e+17	2.61492e+06	2.48512e+06	0.00199099	-7.1103	0.212309	0.00214491	0.0001132	-5.74583	0.540788	2.14491	0.1132
22-Sep-21<	DZ9InPZ10-xl9@1	PZ10	1.75e-09	1.21604e+09	6.94879e+17	566715	2.48018e+06	0.00199229	-6.45657	0.245836	0.000466034	5.48e-06	-5.0921	0.554808	0.466034	0.00548
22-Sep-21<	DZ9InPZ10-xl9@2	PZ10	1.76e-09	1.22832e+09	6.97911e+17	678657	2.50523e+06	0.00199203	-6.58758	0.196269	0.000552507	2.66e-06	-5.22311	0.534695	0.552507	0.00266
May 2021 session at 1270 IMS CRPG, Nancy
95100 standard grain (n = 22), d18Oraw = 8.8 ± 0.3 (mean± 2sd). Instrumental mass fractination = -1.1.
1000*16OH/16O = 0.040 ± 0.004 (mean ± 2sd), range = [0.037 to 0.046]
3-May-21<	DZ9_PM8_XL4@1	PM8	1.47e-09	1.01914e+09	6.9329e+17	603593	2.098e+06	0.00200572	0.260788	0.246008	0.000591576	2.20182e-06	1.8509	0.413316	0.591576	0.00220182
3-May-21<	DZ9_PM8_XL4@2	PM8	1.5e-09	1.04631e+09	6.9754e+17	621943	2.1542e+06	0.00200594	0.369471	0.241602	0.000592954	3.59837e-06	1.95958	0.410709	0.592954	0.00359837
9-May-21<	DZ9IN_WT1-3_xl1@1	WT1-3	1.98e-09	1.42396e+09	7.19172e+17	2.10124e+07	2.93363e+06	0.00201081	2.79531	0.218319	0.0150828	0.0001562	3.78476	0.316055	15.0828	0.1562
9-May-21<	DZ9IN_WT1-3_xl1@2	WT1-3	1.99e-09	1.45303e+09	7.30168e+17	1.50694e+07	2.99458e+06	0.00201116	2.96936	0.229331	0.0106183	4.08e-05	3.9588	0.32376	10.6183	0.0408
9-May-21<	DZ9IN_WT1-3_xl2@1	WT1-3	1.99e-09	1.40538e+09	7.06219e+17	3.51575e+06	2.89072e+06	0.00200693	0.859894	0.204984	0.00254322	2.36e-05	1.84934	0.306995	2.54322	0.0236
9-May-21<	DZ9IN_WT1-3_xl2@2	WT1-3	1.98e-09	1.40583e+09	7.10015e+17	1.08278e+06	2.89085e+06	0.00200629	0.542941	0.225443	0.000776525	6.54e-06	1.53239	0.321018	0.776525	0.00654
9-May-21<	DZ9IN_WT1-3_xl3@1	WT1-3	1.97e-09	1.39414e+09	7.07686e+17	545582	2.86783e+06	0.00200728	1.03826	0.287095	0.000389231	7.28e-07	1.94259	0.317956	0.389231	0.000728
9-May-21<	DZ9IN_WT1-3_xl3@2	WT1-3	1.97e-09	1.37578e+09	6.98367e+17	162939	2.83041e+06	0.00200665	0.724852	0.258053	0.000109255	2.4e-06	1.62918	0.291999	0.109255	0.0024
9-May-21<	DZ9IN_WT1-3_xl4@1	WT1-3	1.97e-09	1.44967e+09	7.35874e+17	1.28129e+07	2984239	0.00200862	1.7061	0.200887	0.00902774	0.000245476	2.61043	0.242957	9.02774	0.245476
9-May-21<	DZ9IN_WT1-3_xl5@1	WT1-3	1.96e-09	1.40983e+09	7.19302e+17	1.00316e+07	2.90142e+06	0.00200795	1.37	0.250142	0.00726748	8.78e-05	2.27432	0.285032	7.26748	0.0878
9-May-21<	DZ9IN_WT1-3_xl5@2	WT1-3	1.97e-09	1.38409e+09	7.02583e+17	435549	2.84685e+06	0.00200701	0.903741	0.212122	0.000310065	2.5e-06	1.80807	0.252326	0.310065	0.0025
9-May-21<	DZ9IN_WT1-3_xl6@1	WT1-3	1.98e-09	1.39984e+09	7.0699e+17	2.82672e+06	2.8775e+06	0.0020057	0.250318	0.203584	0.00205411	2.3e-05	1.15465	0.245191	2.05411	0.023
9-May-21<	DZ9IN_WT1-3_xl7@1	WT1-3	1.97e-09	1.38675e+09	7.03936e+17	687195	2.85094e+06	0.00200601	0.405364	0.234115	0.000495461	3.18e-06	1.32922	0.35637	0.495461	0.00318
9-May-21<	DZ9IN_WT1-3_xl7@2	WT1-3	1.96e-09	1.39129e+09	7.09842e+17	1.39053e+06	2.86216e+06	0.00200762	1.20514	0.196165	0.00101115	4.58e-06	2.129	0.332671	1.01115	0.00458
9-May-21<	DZ9IN_WT1-3_xl7@2	WT1-3	1.96e-09	1.39129e+09	7.09842e+17	1.39053e+06	2.86216e+06	0.00200762	1.20514	0.196165	0.00101115	1.134e-05	2.129	0.332671	1.01115	0.01134
9-May-21<	DZ9IN_PM8_xl1@1	PM8	1.98e-09	1.38646e+09	7.00234e+17	209235	2.85234e+06	0.00200711	0.953565	0.26797	0.000142649	1.002e-06	2.02671	0.450178	0.142649	0.001002
9-May-21<	DZ9IN_PM8_xl1@2	PM8	1.97e-09	1.37989e+09	7.00453e+17	131571	2.83979e+06	0.00200741	1.10003	0.22742	8.5879e-05	1.516e-06	2.17318	0.427285	0.085879	0.001516
9-May-21<	DZ9IN_PM8_xl2@1	PM8	1.97e-09	1.38296e+09	7.02012e+17	504694	2.84485e+06	0.00200721	1.00239	0.24519	0.000361687	2.92e-06	2.07553	0.437002	0.361687	0.00292
9-May-21<	DZ9IN_PM8_xl2@2	PM8	1.97e-09	1.43092e+09	7.26357e+17	1.17199e+07	2.94474e+06	0.00200771	1.25295	0.170696	0.00834029	0.0001334	2.4351	0.193062	8.34029	0.1334
9-May-21<	DZ9IN_PM8_xl3@1	PM8	1.96e-09	1.40432e+09	7.1649e+17	221038	2.88965e+06	0.00200707	0.934134	0.222719	0.000149064	9.44e-07	2.11627	0.240291	0.149064	0.000944
9-May-21<	DZ9IN_PM8_xl3@2	PM8	1.95e-09	1.36144e+09	6.98173e+17	124844	2.80182e+06	0.0020074	1.09754	0.238702	8.19611e-05	1.344e-06	2.27968	0.255175	0.0819611	0.001344
9-May-21<	DZ9IN_PM8_xl4@1	PM8	1.96e-09	1.38612e+09	7.07203e+17	1.14018e+06	2.85042e+06	0.0020063	0.54942	0.258786	0.000832245	4.78e-06	1.73156	0.274055	0.832245	0.00478
9-May-21<	DZ9IN_PM8_xl4@2	PM8	1.96e-09	1.386e+09	7.07143e+17	808016	2.85034e+06	0.00200625	0.521508	0.234893	0.000584796	5.88e-06	1.70365	0.251616	0.584796	0.00588
9-May-21<	DZ9IN_PM8_xl5@1	PM8	1.95e-09	1.3857e+09	7.10616e+17	312493	2.85049e+06	0.00200691	0.854412	0.182916	0.000219028	2.78e-06	2.03655	0.203947	0.219028	0.00278
9-May-21<	DZ9IN_PM8_xl2@2	PM8	1.97e-09	1.43092e+09	7.26357e+17	1.17199e+07	2.94474e+06	0.00200771	1.25295	0.170696	0.00834029	0.0001334	2.34809	0.273467	8.34029	0.1334
9-May-21<	DZ9IN_PM8_xl3@1	PM8	1.96e-09	1.40432e+09	7.1649e+17	221038	2.88965e+06	0.00200707	0.934134	0.222719	0.000149064	9.44e-07	2.02927	0.308628	0.149064	0.000944
9-May-21<	DZ9IN_PM8_xl3@2	PM8	1.95e-09	1.36144e+09	6.98173e+17	124844	2.80182e+06	0.0020074	1.09754	0.238702	8.19611e-05	1.344e-06	2.19268	0.320352	0.0819611	0.001344
9-May-21<	DZ9IN_PM8_xl4@1	PM8	1.96e-09	1.38612e+09	7.07203e+17	1.14018e+06	2.85042e+06	0.0020063	0.54942	0.258786	0.000832245	4.78e-06	1.64455	0.335585	0.832245	0.00478
9-May-21<	DZ9IN_PM8_xl4@2	PM8	1.96e-09	1.386e+09	7.07143e+17	808016	2.85034e+06	0.00200625	0.521508	0.234893	0.000584796	5.88e-06	1.61664	0.317524	0.584796	0.00588
9-May-21<	DZ9IN_PM8_xl5@1	PM8	1.95e-09	1.3857e+09	7.10616e+17	312493	2.85049e+06	0.00200691	0.854412	0.182916	0.000219028	2.78e-06	1.94955	0.281257	0.219028	0.00278
9-May-21<	DZ9IN_PM8_xl5@2	PM8	1.95e-09	1.36041e+09	6.97644e+17	101093	2.79956e+06	0.00200776	1.27686	0.17465	6.41377e-05	1.224e-06	2.33059	0.269787	0.0641377	0.001224
9-May-21<	DZ9IN_PM8_xl6@1	PM8	1.94e-09	1.36376e+09	7.02968e+17	321198	2.80543e+06	0.00200668	0.738805	0.215635	0.000229008	1.112e-06	1.79254	0.297961	0.229008	0.001112
9-May-21<	DZ9IN_PM8_xl6@2	PM8	1.93e-09	1.35567e+09	7.02422e+17	438652	2.7889e+06	0.00200671	0.754254	0.25074	0.000318902	1.388e-06	1.80799	0.324273	0.318902	0.001388
9-May-21<	DZ9IN_PB161_xl1@1	PB161	1.93e-09	1.35899e+09	7.04142e+17	492074	2.77361e+06	0.00199077	-7.22231	0.231056	0.000358578	7.14e-07	-6.16858	0.309305	0.358578	0.000714
9-May-21<	DZ9IN_PB161_xl1@2	PB161	1.94e-09	1.397e+09	7.20106e+17	9.74858e+06	2.85755e+06	0.00199585	-4.67528	0.250343	0.00712406	0.00020001	-3.62155	0.323966	7.12406	0.20001
9-May-21<	DZ9IN_PB161_xl2@1	PB161	1.95e-09	1.38068e+09	7.0804e+17	4.12349e+06	2.81954e+06	0.00199273	-6.23624	0.307402	0.00304304	6.16e-05	-5.18251	0.369836	3.04304	0.0616
9-May-21<	DZ9IN_PB161_xl2@2	PB161	1.94e-09	1.35955e+09	7.00801e+17	202966	2.77323e+06	0.00198969	-7.76446	0.291992	0.000140688	1.15e-06	-6.63933	0.371776	0.140688	0.00115
9-May-21<	DZ9IN_PB161_xl3@1	PB161	1.95e-09	1.37282e+09	7.04012e+17	400419	2.80171e+06	0.00199046	-7.37653	0.132891	0.000286612	6.02e-07	-6.25141	0.265741	0.286612	0.000602
9-May-21<	DZ9IN_PB161_xl3@2	PB161	1.95e-09	1.37508e+09	7.05167e+17	2.01159e+06	2.80865e+06	0.0019931	-6.05309	0.275948	0.00148489	7.76e-06	-4.92797	0.359313	1.48489	0.00776
9-May-21<	DZ9IN_PB161_xl4@1	PB161	1.94e-09	1366311430	7.04284e+17	2276191	2.79064e+06	0.00199257	-6.32005	0.205401	0.00169234	2.32e-05	-5.07432	0.345102	1.69234	0.0232
9-May-21<	DZ9IN_PB161_xl4@2	PB161	1.94e-09	1.41449e+09	7.29121e+17	1.21106e+07	2.89446e+06	0.00199672	-4.23998	0.249595	0.00874885	4.42e-05	-2.99425	0.3731	8.74885	0.0442
9-May-21<	DZ9IN_PB161_xl5@1	PB161	1.94e-09	1.37459e+09	7.08554e+17	3.26949e+06	2.82393e+06	0.00200425	-0.471386	0.264023	0.00241545	2.98e-05	0.774344	0.382902	2.41545	0.0298
9-May-21<	DZ9IN_PB161_xl6@1	PB161	1.94e-09	1.36865e+09	7.05492e+17	2.23762e+06	2.79394e+06	0.00199141	-6.90037	0.184286	0.00165586	1.218e-05	-5.65464	0.332967	1.65586	0.01218
9-May-21<	DZ9IN_PB161_xl6@2	PB161	1.93e-09	1.38454e+09	7.17379e+17	8.28967e+06	2.82854e+06	0.00199302	-6.09173	0.303619	0.00611682	0.0001876	-4.846	0.411206	6.11682	0.1876

## Sheet: G50702
Zakharov, D.O., Zozulya, D.R., and Colòn, D.P., 2023, Quantitative record of the Neoarchean water cycle from a 2.67 Ga magmatic-hydrothermal system, Fennoscandian Shield: Geology, https://doi.org/10.1130/G50702.1
